# Supplementary material
Source: publisher figshare collection journal article supplement (https://gsajournals.figshare.com/ndownloader/files/20411304)
Supplement: Supplementary file 1 [file 20411304]

## Sheet: Final 
						Groups	MYD iSpen																														HYD iSpen
N.	compound	CmpdID	Pathway	parent	medRt	Polarity	61-dcg_iSpen-MYD1	62-dcg_iSpen-MYD1	63-dcg_iSpen-MYD1	64-dcg_iSpen-MYD1	65-dcg_iSpen-MYD1	66-dcg_iSpen-MYD1	67-dcg_iSpen-MYD1	68-dcg_iSpen-MYD1	69-dcg_iSpen-MYD1	70-dcg_iSpen-MYD1	81-dcg_iSpen-MYD2	82-dcg_iSpen-MYD2	83-dcg_iSpen-MYD2	84-dcg_iSpen-MYD2	85-dcg_iSpen-MYD2	86-dcg_iSpen-MYD2	87-dcg_iSpen-MYD2	88-dcg_iSpen-MYD2	89-dcg_iSpen-MYD2	90-dcg_iSpen-MYD2	101-dcg_iSpen-MYD3	102-dcg_iSpen-MYD3	103-dcg_iSpen-MYD3	104-dcg_iSpen-MYD3	105-dcg_iSpen-MYD3	106-dcg_iSpen-MYD3	107-dcg_iSpen-MYD3	108-dcg_iSpen-MYD3	109-dcg_iSpen-MYD3	110-dcg_iSpen-MYD3	1-dcg_iSpen-HYD1	2-dcg_iSpen-HYD1	3-dcg_iSpen-HYD1	4-dcg_iSpen-HYD1	5-dcg_iSpen-HYD1	6-dcg_iSpen-HYD1	7-dcg_iSpen-HYD1	8-dcg_iSpen-HYD1	9-dcg_iSpen-HYD1	10-dcg_iSpen-HYD1	21-dcg_iSpen-HYD2	22-dcg_iSpen-HYD2	23-dcg_iSpen-HYD2
1	L-alanine	C00041	Amino acids	90.0556	0.657251	+	185176600	30883970	226791700	208217100	95360510	130385800	224279200	242626800	108646300	175875200	157230500	47788180	256564000	127563900	154999200	321838000	116950900	309779300	244083100	169533200	284790200	233687800	254029000	291223300	241267500	164444100	252115000	316417200	361753100	245872400	218145800	215790000	23342510	175755700	12833790	32040450	17226550	24572650	265195100	101318800	231365000	142053300	16421630
2	L-arginine	C00062	Amino acids	175.119	0.633657	+	92253270	23306740	49033700	76117350	24163340	56413370	80647030	96318170	67149290	91786410	75805070	15314500	76797950	45109900	74650460	88579390	28740270	69738570	73658900	27912510	73630380	74300350	89672290	58751820	80016650	34004060	93483740	79954140	73331660	74458750	92148060	53757100	5570800	51362580	2651689	8064190	5096056	7452440	75171170	72255900	74873690	44829730	4276792
3	L-asparagine	C00152	Amino acids	133.061	0.662722	+	5382368	3183203	10254440	8067020	5968018	8134118	8155198	6648196	7509056	5702338	12820480	2900964	7436930	5353429	2852726	10716330	7212936	6259664	7856126	6973242	6861712	11504910	10434920	6619902	6650146	10416880	7085364	14535220	15799750	10605140	14454100	8217418	1480410	10874370	990008	1369294	1228423	1376674	12070790	10293820	11255740	7507204	1320033
4	L-aspartate	C00049	Amino acids	134.045	0.674351	+	2796935	172827	5087596	3559951	1223772	897663	1867286	2758120	2072901	2107635	2020764	476520	3038477	4759108	2909302	3530283	3075114	3288595	1838774	1560746	2712317	4661355	2763366	5331990	1737621	2143851	2514997	3418497	3715636	4950950	1644539	1657847	182822	2060864	124411	323474	183328	411290	1432199	3907140	2876271	3310773	144594
5	L-glutamate	C00025	Amino acids	148.06	0.661962	+	43133740	14217800	68844930	70315820	20541980	34429330	35317450	44464500	66149480	39172180	48581070	12991950	54554200	78387380	37329540	41827980	66065880	44251200	32000390	37320680	98712730	58115760	47918400	83003530	47751830	104582300	50899410	62109630	67601740	105021500	61408140	40382930	8244516	51886290	2055412	7949462	4101264	9307895	48093250	41682220	53747720	62933660	3628115
6	L-glutamine	C00064	Amino acids	147.076	0.658957	+	77122850	28248880	88761580	93495880	55825980	60263180	81529950	64435120	81481490	73101830	170863400	17513890	116722100	71355510	43949740	100583400	49463420	80887340	66903840	76069580	69672290	106831700	101450600	68936110	61652800	119510100	99926040	131955500	158706300	102066600	162682500	96956520	12662260	105533700	5503116	17119330	7658466	12072900	147837200	98425470	124312400	78643020	8867417
7	glycine	C00037	Amino acids	76.0402	0.662506	+	11720700	2766626	9155176	8958538	6014206	8857971	9196523	10156700	11280780	9122761	13794380	3385244	15755270	10448840	7503562	17779890	10019220	13565860	12640800	9654948	13476940	13966960	14260930	11826550	10042860	12644060	11210100	15970110	18958730	11757080	12606680	14495180	2654972	8793023	1882052	2980934	2109723	3145710	11169550	9657900	12346150	7602804	2005774
8	L-histidine	C00135	Amino acids	156.077	0.633794	+	39704680	9803827	35836930	32586760	19533090	24506090	48127790	42848990	32206690	47087350	54326880	9087280	48818020	43751510	31217630	47325420	22379940	53059240	28507240	27554580	52080500	56120830	59340460	45053160	39842400	39933450	41487230	47888130	41983390	49908880	32931840	26578510	4154265	34842000	2083841	4298254	3969590	5395756	41462100	40437940	35700320	32780360	2119264
9	L-leucine	C00123	Amino acids	132.102	0.668164	+	172540800	32276496	189521392	132264640	27713270	103427880	142181840	181162416	118652712	178431264	61771392	27677186	278862304	55935292	100022680	215228848	103747352	121699736	164762208	82743488	140602464	337772928	220513936	174701552	161149936	120878040	123785568	319884960	389859744	217061840	177305088	187950848	27660882	216911728	8365940	34098960	19236068	25041880	227574576	126022848	262840112	198114944	16767996
10	L-lysine	C00047	Amino acids	147.113	0.620826	+	64029440	5772620	48486370	49968890	15287080	35888940	69319810	65235350	55445120	34871600	49369120	5744398	108817100	30511660	37654880	103254900	38379410	86721410	62402770	19123080	97346340	67614380	95915610	69065770	74490170	34242270	57916990	89782210	107417000	109184300	63277680	62335280	5078277	41032180	2167246	9924151	3647887	8244818	70634060	70238050	53637100	26190370	1112474
11	L-methionine	C00073	Amino acids	150.059	0.669221	+	24770880	3172017	18404310	15369870	1937328	18712220	13099420	16553190	20636490	6802154	11943260	2436856	28374470	4931278	9179488	22157180	9162478	26452550	12831120	6149688	24864230	26244160	25179080	23421060	19989720	19478010	9501215	42796610	45919810	29275580	28671660	15027700	2681384	22002030	1263168	3130734	1990322	3340623	29633750	15567600	28090470	19115090	1447721
12	L-phenylalanine	C00079	Amino acids	166.086	0.66996	+	41811320	4779636	27205830	28906660	4313360	22459590	27927960	33274450	24314200	27376500	13905000	4148269	52112850	10224500	21647290	51138820	15580710	31202150	32275690	12528900	30647880	46731490	45448400	28597100	31125540	18875840	23765910	58405620	61606960	37309870	33597570	33573040	5033894	29277870	1645244	6253478	3629677	5573002	37137080	15658660	43257650	30066020	2917455
13	L-proline	C00148	Amino acids	116.071	0.663779	+	424935800	75496330	508327500	513846300	110902100	247646100	565921200	501440600	269831700	516358100	419111300	121443300	463667300	600097700	253398600	531308900	283807900	589530700	481547800	257286000	534644000	609258700	629919700	477178800	433274400	589353400	453935300	655249400	691549200	557341200	603570400	387956600	50784130	542920100	21339240	64554720	32117930	63684720	537782800	214218400	623480800	323404300	41868430
14	L-serine	C00065	Amino acids	106.05	0.662558	+	5122396	2225675	9878129	6435748	3628136	6086002	6180086	7322820	7187466	6110728	8257412	2325498	7709654	8495968	4706040	9032779	8644845	8382376	7114300	6402478	9073949	9436731	8935875	9416701	6288242	11809820	8908203	10888760	12582490	10224060	8743353	9556446	1691429	7291012	972827	1367040	1345707	2146229	10138240	6504788	8505183	6158084	960922
15	L-threonine	C00188	Amino acids	120.066	0.659129	+	58968830	6699952	55343200	50623600	19238310	39893040	52696970	56513800	55136030	36982860	50603570	10489320	76206330	32696750	33200760	68364480	37515700	58850200	43153190	30482270	57882600	61155600	59481460	59482240	46490930	50259070	50081590	80403300	95989600	57090710	54383270	55327080	7371830	37982600	2622044	9925704	3610271	8443231	54293500	49455810	51407750	36780370	3148307
16	L-tryptophan	C00078	Amino acids	205.097	0.670776	+	6650262	1141282	5757670	7020892	1215658	5719340	7206620	5591733	3883369	5687614	5757060	2103986	5460128	5098784	2140030	9047465	3075783	6892084	5320610	2887257	6176262	8862359	8002190	6708696	5967980	5301168	3107083	11019520	10253010	7633778	10075420	3497473	742704	7507424	386817	692687	766204	824033	8878355	1795925	11357950	7085540	713764
17	L-tyrosine	C00082	Amino acids	182.081	0.668643	+	445574600	16989850	114413700	517013000	31845670	73460930	293169200	342514800	125083700	420933500	299369200	20896940	296555400	174581200	224833400	320327100	50764900	389620700	163671200	50017950	393331300	227310600	507765600	104123800	293223900	75650660	294615200	190253200	188905200	341688700	395473800	145199800	12540060	85421350	5427269	14684070	11107630	14792660	181069900	70500760	325614900	156053600	13004860
18	L-valine	C00183	Amino acids	118.086	0.666943	+	100213000	13941530	133380000	77447670	15528700	55647000	81867910	123256100	74049730	100708700	39377440	14593040	167753200	57554230	61232920	134309900	85037380	85209260	109177000	44786900	103562300	190133300	126305600	109134500	99821700	84563450	66156180	178326100	208197000	149371000	118403200	121789100	14648440	114397700	5863400	20115480	10219520	15162820	140433100	108570000	157188400	98423240	8695903
19	AMP	C00020	Nucleotides	348.07	0.682202	+	2925237	303214	5051330	3949039	696758	1583588	2780636	2367313	2149380	4719935	3908196	371766	4637754	3145969	2449452	3685666	1787971	2953378	2338246	1760977	3566922	3119679	2957906	3059415	1727470	2266608	2606248	2433141	2321012	3457864	4144775	2149350	125418	2829887	50193.4	344084	219717	328185	2861709	1094337	2340079	1187309	83116.7
20	Adenosine	C00212	Nucleotides	268.103	0.666153	+	1754831	606640	2771454	1606840	693165	1226536	1082356	1250012	2513762	1716432	1280546	421036	1541575	1643485	827399	1471666	1440782	1663274	1070016	1021034	1641849	2382756	1312475	2492307	876008	2320298	1274396	3143575	3020116	2459095	2745313	2570513	223229	3159722	99912.7	238547	158291	230998	2626679	1818603	3704906	2759445	217197
21	Adenine	C00147	Nucleotides	136.062	0.670483	+	698564	201202	906768	769969	350439	419968	584720	706205	587940	858666	689313	405266	917566	722582	341268	994653	533921	1218660	608535	386996	641949	653984	682503	607708	479786	921307	423748	659270	659547	861096	918141	716034	337103	696670	283988	224291	263578	335888	767559	350214	777276	390625	278825
22	Guanosine	C00387	Nucleotides	284.098	0.669275	+	995459	138682	603795	921584	97731.5	428508	806229	705122	398835	656103	454988	233406	1115352	588360	422827	1168679	458628	903791	820595	248710	1012216	1030376	1043329	1028485	635989	1002251	460667	1003719	1066698	1131038	975258	718643	128753	749147	35637.8	71968.5	123891	185185	1101347	391408	1348223	1450673	127063
23	Cytidine	C00475	Nucleotides	242.08	0.658239	-	273779	57197.4	216706	289035	225524	100751	465644	244821	134640	311232	548860	48236.6	458641	357749	287742	501888	281063	646831	439100	374636	365519	373257	347647	486958	323312	149059	400121	268208	359510	348838	283416	437337	31738.4	283164	3295.82	58428.9	6650.89	41709.1	357765	283226	203765	86440	6077.06
24	Thymidine	C00214	Nucleotides	241.082	0.663413	-	76032.6	48623.8	97700.4	54908.8	27572.5	60739.7	50554.3	75394.1	46927.9	55020.1	45959.2	39374.7	59171.6	48584	61829.2	51226	45916.6	45943.9	132609	29592.5	48352	73730.7	162649	75332	83931.8	48898.2	58757.4	77185.5	105860	53000.6	73497.5	72489.5	36792.4	92179.9	27993.9	26159.1	32059.2	26339.4	96011.3	47546.3	95999.8	85884.7	22292.9
25	Thymine	C00178	Nucleotides	127.05	0.66158	+	192678	31888.2	195734	135414	41616.6	88741	65352.4	241462	163796	195228	350311	57413.3	146697	274895	199842	139337	193213	246149	103051	123490	82795.6	104515	60458.4	86452.2	124607	224755	58634.9	70186.6	35620.3	64611.8	47267.2	90973	9419.19	227751	10247	13860.9	12673.7	16992.6	50877	45659.1	35047.2	33924.2	9891.41
26	UMP	C00105	Nucleotides	323.03	0.573774	-	186326	37280.1	243373	566573	21290.1	40258.2	306712	600669	77994.4	169647	134272	11113.9	133162	306230	303149	155532	53642.9	214210	300656	48930.6	139745	164906	189658	120313	291335	64666.2	118235	109673	123659	229862	295546	110693	7197.22	418807	2447.41	10752.3	1880.2	6548.53	191194	392357	98711.2	71493.9	2672.29
27	Uracil	C00106	Nucleotides	111.019	0.663199	-	635172	149945	631860	629573	153047	304711	663169	1080146	433339	684374	452820	184238	605322	490703	578136	751930	373535	447550	1170677	266635	380114	808678	571282	315790	1030714	428115	389404	836822	974396	911219	739210	730783	138622	1301619	92655.8	163726	114034	126314	852855	466287	875746	561824	83879.3
28	IMP	C00130	Nucleotides	347.041	0.568512	-	344377	94533.7	118592	194957	20067.4	95664.4	353337	407596	96666.2	208541	225495	15581	151836	181821	254384	197698	42776.8	251947	462230	47021.7	242611	260186	275137	160236	388914	79618.4	168379	244771	254959	162714	257046	169095	521.898	305912	0	0	1965.59	1304.25	283175	374822	191834	62074	0
29	Inosine	C00294	Nucleotides	269.087	0.671077	+	3408278	1072246	3181067	1912006	778606	3278849	2012237	1402798	3047376	2719749	1841874	681695	3072627	2007850	1432627	2804458	2354328	2727329	1969018	1251805	4263350	3053256	3471355	4406566	2460655	4988322	2276000	5445794	4782752	3636181	2614043	3735172	957968	2610615	267865	713179	582114	849212	3772891	1161464	6856160	6034854	555584
30	Hypoxanthine	C00262	Nucleotides	137.045	0.670913	+	5165750	1726410	3778978	2661139	1483209	5351652	3187374	2190286	3662196	5057846	2655671	1351745	5953394	2685538	2175122	4748326	3459003	5691986	4170098	2446854	6931996	5058460	7664118	7429988	4592442	6875056	4107269	8475173	9571921	6058436	4915070	7459562	2769200	4803476	890180	1895276	1681152	2663782	6639492	2233257	9905700	7017258	914556
31	Xanthine	C00385	Nucleotides	151.025	0.656838	-	1443456	219716	442514	568751	106048	481679	1366779	658708	320055	669695	969847	150707	1048739	531817	327759	1172225	178969	1928432	1795454	423903	669234	1162356	1965277	697908	1065669	413119	576770	1283484	1621257	778080	1577940	1065225	144652	1047560	41113.2	138596	130044	141055	1146460	633403	1166824	204026	56374.2
32	Allantoate	C00499	Nucleotides	177.063	0.679558	+	388999	526426	321056	304704	909910	622665	195683	234492	527058	238453	452845	988366	394950	288683	331324	311658	530862	233580	268341	676173	297022	212351	199608	328710	163658	365938	269982	209261	340032	135315	329769	282764	15408.7	37586.3	825773	50065.7	680556	1547095	11150.5	131640	255265	30447.3	763500
33	(S)(+)-Allantoin	C02350	Nucleotides	157.036	0.659081	-	674064	792096	527347	1067585	514749	471656	556198	871715	358576	359773	652236	154433	297957	649781	922934	419556	255120	582690	766238	424405	688032	500794	699357	944084	916586	464313	997583	433597	471130	743107	756220	568580	152334	1467828	82206	98426.4	110477	160847	1136113	831814	793933	1066053	96618.4
34	5-Hydroxyisourate	C11821	Nucleotides	183.015	0.599769	-	178055	114148	81271.3	129834	27290.7	162228	105212	72539.4	25730.8	161528	190436	34849.6	117251	45700	29369.2	155273	10707.5	187361	126354	162650	55828.6	234395	175491	46797.2	71245.4	26100.4	128842	147854	194534	44438.7	187244	98355.3	7915.68	150482	2556.03	36340.6	4027.32	9472.34	93677.7	55119.4	193163	59714.9	4359.22
35	Urate	C00366	Nucleotides	167.02	0.608811	-	650149	1480773	379780	1237091	79771.8	158182	2020792	1908206	60854.4	842573	449122	120583	277630	385853	476771	781029	73242.1	1697264	2353333	147466	250579	1263273	939505	276894	2101055	127329	262854	864126	1052400	195155	1355232	197046	115872	3123086	84832.3	70999.3	67773.4	90787.4	887440	1526851	1326977	195267	84539.3
36	2',3'-Cyclic CMP	C02354	Nucleotides	306.049	0.671262	+	205770	394829	337853	44546.5	529919	431242	117387	112212	261158	100302	205660	424328	331797	134780	56818.6	174445	418684	98954.6	172633	513844	164986	280607	337494	315317	85111	185113	195619	321349	291795	114158	162433	514933	757636	345132	532718	215698	527747	941981	269400	208536	153887	459295	578678
37	5-6-Dihydrothymine	C00906	Nucleotides	127.051	0.665556	-	532314	358115	962583	708340	323383	551246	907290	965994	636676	467023	1172057	128617	632672	658191	421239	854207	310426	635001	852262	474630	479000	736827	966365	743825	938161	642776	568643	722736	915871	1105404	1321882	843481	102054	1007922	42879.7	108903	60556.7	109196	1118953	1852212	977009	738046	64650.3
38	Nicotinamide	C00153	Nucleotides	123.055	0.68062	+	1853349	708622	1832763	2617110	741580	1022463	1914068	1772230	1074329	1586251	1619616	660377	1525918	1313246	1299692	1546984	915072	2093378	1362690	715138	2424718	2064340	1878115	2095976	1804149	1573213	1934982	1671593	1855117	2237406	2252960	1479588	902170	2069352	683865	633736	620761	638800	1411359	690785	2022282	862845	717862
39	Flavin mononucleotide	C00061	Nucleotides	455.103	0.648914	-	22047.6	226088	8350.93	37274.3	66044.3	8606.97	34550.9	39890.3	77749.2	10841.2	34801.3	135208	11000.1	47821	53150	0	64802.5	37255.1	45800.7	40711.7	18499.7	8678.72	0	8807.89	50396.4	26947.9	20745.2	2788.59	0	4108.1	29112.5	29985.4	36164.2	84543.6	79645.7	324043	108208	98095	34382.4	114907	6017.19	28353.6	169450
40	NAD+	C00003	Nucleotides	662.104	0.575794	-	199420	43026	138448	247090	23459.5	76375.8	252393	248846	64968.4	148316	150845	23190	186252	155957	177408	123319	37439	200007	214836	45938.4	116306	149065	123009	74260.2	182643	63431	142332	112857	98373.9	142042	253689	56431.9	1863.65	189291	0	3116.16	4558.86	6299.47	142386	189012	208626	50290.2	3778.62
41	Phosphate	C00009	Phosphates	96.9686	0.560685	-	28308770	4731608	9577216	35726260	2839208	6329678	28880360	40630700	8117084	15486070	14323370	3839732	13318090	18366790	24716350	16917080	5510016	26700430	25237540	5534720	26161280	15593380	20133390	12415140	30750590	6670094	11387260	11942440	10796810	16724780	22327560	8483695	1058264	14309040	1025087	2829665	856129	1483690	14727190	10793410	22026900	8202224	1690965
42	Diphosphate	C00013	Phosphates	176.935	0.605473	-	1467863	63583.9	346729	2299391	22866.9	115151	1434591	2756780	155191	790300	748009	10838.4	603236	797851	1029139	741899	109196	1400253	1024646	36948.2	1299579	692222	1133614	389252	1781066	181989	485133	522511	450545	942458	1111398	131514	9358.29	564365	5577.16	3957.35	0	7400.1	655247	549216	937924	201900	7792.93
43	D-Glucose	C00031	Glycolysis	179.056	0.65313	-	8250516	4571066	7226258	7170826	2170462	6374850	12772720	8163934	4060241	7995282	4336390	1857442	5676590	5400684	4184982	9121104	2955654	7176206	16397300	3859101	5060046	9886973	22275180	8363126	11300100	4315752	6870054	12053860	15816920	7033178	9433488	9233015	1535217	11999220	602227	1625967	1079956	1607348	12311030	5385896	14107990	11006540	1086517
44	D-Glucose 6-phosphate	C00092	Glycolysis	259.023	0.560189	-	1738486	789084	2278650	4256792	168510	945733	3684951	5340296	772352	2853575	1177545	117569	1198414	1656398	2630469	1890493	803670	2769456	4815241	379888	2365960	2524404	2625761	2645693	6288548	1066172	1865541	3523291	3663256	2396831	4435278	1199468	21267.2	3833577	8147.19	108201	41726.6	24703.8	3637268	2806052	4157899	1384317	17699
45	D-Glyceraldehyde 3-phosphate/Glycerone phosphate	C00118	Glycolysis	168.989	0.5312	-	229977	42196.9	254114	651845	26645.2	90894.9	555914	647882	114810	219394	204454	15709	204348	257893	400438	296640	115413	483027	635396	58763.4	243748	245080	212061	224320	512956	145861	195878	154922	172571	332383	415024	132490	21029.1	418589	18284.8	17374.8	12990.4	0	240616	342300	163841	15807.9	18326
46	2/3-Phospho-D-glycerate	C00631	Glycolysis	184.985	0.565814	-	331007	45227.2	105659	503567	8801.76	39673	357246	599107	49863.9	170242	138925	10708.4	98214.2	143897	207898	165189	36289	337501	409401	12623	126025	217239	338532	82218.3	705360	89086.7	124021	173730	126603	231740	303238	76839.6	5437.72	200442	12848.2	3827.92	4261.1	0	222226	395958	195433	13609.3	1829.73
47	Pyruvate	C00022	Glycolysis	87.0077	0.57131	-	8132216	2810861	12362870	9478135	1866036	5896126	9846891	16890920	4640002	9124716	6879846	1295400	9190188	4638439	9444282	9475749	3355054	7500532	13828340	4558390	10499550	9722430	6504822	9501421	13534740	6353578	9645644	11300650	12925800	9285103	13880840	9552217	857136	16095620	674087	1231129	585148	683989	8907080	5063490	9639247	3125462	638412
48	Lactate	C01432	Glycolysis	89.0233	0.576803	-	40778690	13092360	32883030	19388500	8236734	40268880	72645080	39986350	5819268	48523930	31543430	11214010	71762410	4359968	21746570	70550760	5581873	48872280	124867300	32229470	18301740	62691480	73270700	35973330	35351300	10660830	47383120	106108200	102558500	13357770	79823340	67134620	4285088	62611630	3817846	8222418	5275126	4097538	65319060	10344280	103581100	15508160	6009556
49	Maltose	C00208	Other sugars	341.11	0.661969	-	6529186	9890078	1990610	10510640	3335027	6242080	12319460	9833372	2844379	6707612	6764754	6183988	3765187	10817240	16211970	5238776	3673292	3690973	15245550	4404535	5363257	6807686	3028039	2685727	6924080	2240446	5401876	3081880	4946916	4646572	2375791	4521362	1244860	8723507	1187518	12968130	500929	2239548	4834802	4094131	5945248	4994656	5415325
50	Maltotriose	C01835	Other sugars	503.164	0.652508	-	321754	143903	42929.3	203080	168502	121989	186428	170955	72304.5	221146	58628.8	57766.8	108831	138664	272481	170480	51092.1	77137.6	514613	136431	127454	277730	337016	95459.9	169537	23389.8	302373	174160	163081	178473	65784.3	139208	19575.5	119343	8454.97	24916.4	4255.93	20298.2	211064	79716	187647	132461	18214
51	D-Arabitol	C01904	Other sugars	151.06	0.664835	-	1189088	269078	1087511	1318922	395938	764723	1345905	1443218	577589	1129252	832336	372083	1144170	1037955	592614	1352141	784894	1206535	1526532	728630	1315748	1353822	1750219	1908078	1692692	1182312	897994	1679999	1554810	1991179	1606614	851540	214574	1564882	128210	289073	196971	196428	1331948	564575	1573146	938863	154285
52	Citrate	C00158	TCA cycle	191.019	0.557427	-	1386981	582240	1016394	11740700	29904.6	40427.7	3006463	11622200	512011	752348	1210096	19543.3	384585	3903594	5016554	542991	198992	1864679	3105562	37277.8	4884120	1228518	1716680	1670121	9098561	941614	815896	576838	596583	3991660	1786170	239666	9960.63	4153001	1732.18	12203.8	6476.84	4927.34	812983	9730002	986294	614598	3337.05
53	2-Oxoglutarate	C00026	TCA cycle	145.013	0.536073	-	817975	703299	1337032	2810823	182938	347980	906653	2277846	733304	934786	1181003	87403.8	648432	1652389	1614279	673245	612918	980180	1002808	382381	1749240	860042	806009	1635392	2165052	1480180	737587	712811	614257	1874525	1291183	670663	28137.3	1971080	4901.56	36071.4	12832.5	13592.1	904462	1094687	838610	765401	9900.9
54	2-Oxoglutaramate	C00940	TCA cycle	144.03	0.587898	-	149564	47322.3	176082	273326	43085.2	28555.7	118240	363437	144548	152288	237214	16534.2	93221.9	301010	207371	94006.3	68555.9	97508.5	110176	102815	85489.4	90915.5	71152.2	113171	144206	89049.9	106773	79275.9	56704.9	106114	183944	127949	6640.94	285505	6833.3	27064.7	3862.6	12269.4	70925.3	222958	136550	85768.1	6620.13
55	Succinate	C00042	TCA cycle	117.018	0.539661	-	23031110	5390196	5905072	7312998	3528948	5958642	21535230	6361770	3086512	18418110	14703070	2375515	19639610	5820866	4982566	16503420	1867588	24435260	22707180	6503462	3379754	5763832	7602850	5294846	7951424	3835089	8484297	11706880	10134320	5855186	20157750	14961310	562455	8316986	109270	1233705	409097	695698	12133740	3125941	19487950	4140714	408394
56	Fumarate	C00122	TCA cycle	115.002	0.53234	-	459038	209329	1.51404e+06	1.32093e+06	235731	216545	741965	1.45045e+06	273151	608715	429454	75932.7	419768	659515	590858	837182	413118	683643	1.11854e+06	333538	819375	1350258	1177781	1312748	1447224	570164	795456	1623398	1383165	1287153	852274	509785	36528.9	1.83763e+06	19087	38544.7	28489.1	23299.3	833043	1.56573e+06	1.14759e+06	782104	19626.5
57	Malate	C00149	TCA cycle	133.014	0.559683	-	6275408	1499634	9248087	27001170	778814	1084429	14596380	26304430	1718969	7425766	5408988	287936	4282674	6877540	8781448	10115330	2674003	12007030	18020350	1509976	9975897	12776540	18943040	8962399	21816100	3892044	8507988	10451530	9889368	11928430	14304980	2668917	41798.2	13742790	18929.4	171727	61386.9	72547.2	6664108	13465900	11136650	5103529	43680.9
58	Itaconate	C00490		129.018	0.554192	-	1401263	418759	1256166	1632055	169311	495897	2097670	1958803	179620	1655656	1695575	116364	1472964	203626	1110694	1986310	249964	2916898	2636374	546496	903291	1920664	2576510	2088717	2106761	771397	1284624	1845921	1963592	807820	2964607	961142	23598.4	1781029	12179.8	84842.8	31551.7	33479.9	1322008	307495	2336615	1131758	33825.6
59	2-Hydroxyglutarate/Citramalate	C02630	Alternative Carboxylic acids	147.029	0.544554	-	19893860	7708636	16060640	19884150	2634646	8646231	28902670	28934530	2082190	19605010	21386150	1992107	18764100	1919524	14948570	22891890	3206554	35934740	35080520	6809170	12069570	23491060	27882960	26150200	28347980	10166020	16850670	23715340	25257000	8643259	32687170	14866140	417086	25177420	89214.1	1056137	320081	390455	19871890	2925770	28011910	14356830	365014
60	6-Phospho-D-gluconate	C00345	Pentose Phosphate Pathway	275.02	0.623576	-	15199.6	31196.6	20264.1	47981.2	18905.5	11360.5	16240.7	53094.3	27301.6	23786.1	38111.5	16229.5	14690.9	25504.8	23675.2	13081.4	20373.2	22246.8	26402.7	21278.8	8675.64	7549.47	17768.2	12476.5	63556.2	29096.4	13661.3	19214.4	17438.5	18373.9	26589.7	17324.7	10098.9	38297.9	2832.19	15944.8	14634.6	8659.3	33029.4	84790.2	16477.7	18342.6	3819.92
61	D-Glucono-1-5-lactone 6-phosphate	C01236	Pentose Phosphate Pathway	257.008	2.01907	-	84450.6	68821	73127.4	97636.5	63786.1	58528.4	95085	120572	67218.4	61831.3	64571.8	71559.4	52361.6	77502.1	98470.3	64622.9	69048.5	93197.1	88930.9	63143.4	58788.8	49090.9	53329.2	63832.7	90256.8	57183.5	62232.6	66107.4	45244	59184.9	63835.5	79464.6	63275.2	85826.9	71531.7	63512.1	55327.8	65922.2	71936.5	97133	56927.4	57792.8	62780.3
62	D-Erythrose 4-phosphate	C00279	Pentose Phosphate Pathway	199.001	0.54768	-	118301	19392	88731.8	186373	16389.1	26508.7	194252	207140	33178.6	126711	84620.5	9924.56	73027.4	78867.9	128701	91643.1	25577.8	156715	265099	34613.4	127598	98949	114371	99419	182169	48442.7	110683	117924	121500	127826	135109	74001.3	1551.3	123155	797.749	2683.7	2494.63	1266.9	98566.8	188396	111936	24356.8	2303.88
63	Sedoheptulose 1-phosphate	C06222	Pentose Phosphate Pathway	289.035	0.579329	-	193799	51451.1	118066	281497	22762.5	40130	434332	356328	50793.6	188508	93355.1	15186.5	120871	163245	236502	197285	70839.9	333450	483127	37361.7	150271	230185	211149	137004	312286	72428.6	161355	197922	224113	148175	149230	82210.7	10034.1	212711	8089.33	17128.9	11152.3	17600.8	161358	178134	202817	100836	9095.38
64	alpha-D-Ribose 1-phosphate	C00620	Pentose Phosphate Pathway	229.012	0.572718	-	254453	78293.7	235316	336942	19215.4	150825	498653	535066	102752	497725	136498	14772.8	169451	238322	335549	233188	98018.8	444305	632014	54899.3	250367	296700	372008	314606	705830	118170	227063	331753	379048	280758	478959	293000	3783.88	494524	2363.89	20298.4	3888.39	3645.38	449100	355287	352341	76375.9	2556.87
65	Glutathione	C00051	GSH homeostasis	306.078	0.570655	-	837299	522667	555782	2586601	114238	149345	1867906	4609820	447528	684619	273196	72156.3	766665	1453525	1351377	1532084	119121	948660	2709523	96923.6	314724	302126	317856	466730	1338498	76015.8	204992	331208	405049	562140	1256619	838203	4580.87	864154	0	21087.6	5801.24	1240.19	1092403	2020318	870568	115097	2640.05
66	Glutathione disulfide	C00127	GSH homeostasis	611.147	0.546526	-	200558	19795.5	55417.4	261826	16967.5	20691.8	220152	387985	41205.5	59192.8	83955.1	10371.4	119110	139006	130590	176631	19951.4	245277	235895	14213	115835	48292.1	103405	70706.5	267754	10718.9	62367.7	89184.4	102849	183640	300240	85600.4	0	116562	0	0	0	0	218986	284115	170893	14282.7	0
67	5-Oxoproline	C01879	GSH homeostasis	128.035	0.567071	-	3819652	983148	3730532	4240386	633086	1803487	2547861	4358864	2996857	2380655	3025501	513622	2560305	4059286	2962712	2199998	1385526	2284469	2967458	3280271	3313405	2741350	2636254	3261245	2792176	2125530	2310949	2519855	3315716	4259845	3911481	2146890	321739	3860537	203261	622083	160721	352370	2390730	2791037	2977427	1909992	171488
68	Ascorbate	C00072	GSH homeostasis	175.025	0.628646	-	51784.9	25655.3	99777.3	161165	6970.45	25103	143643	398909	7875.19	85742.9	89029.7	30930.3	36618.2	95912	189708	120184	42448.7	154904	165640	19544.3	96068	150178	131520	92751.4	155530	60460.7	75559.2	91258.5	125068	150636	162276	60562.5	2600.93	270519	6652.28	2288.23	15565.4	845.513	117548	69053.2	138950	86698	20390.1
69	Dehydroascorbate	C05422	GSH homeostasis	173.007	0.547529	-	108232	41394.5	88341.6	269708	12094.6	24885.9	105311	241001	33288.4	59492.5	72842.8	34469.8	56897.2	159034	170439	95359.7	44538.3	104390	159681	26155.6	164748	97005.4	108073	144240	250441	59863.6	59040.2	87223.7	79025.9	194884	88156.4	27942.3	23717.3	195133	25934.3	14232.9	29853.2	16333.1	72978.6	375152	122977	61253.3	19904
70	gamma-L-Glutamyl-L-cysteine	C00669	Gamma-glutamyls	251.07	0.675875	+	375911	899644	555225	664889	1173415	728959	535448	532945	1028803	289688	1144774	208840	605006	1004142	237545	954528	369896	580337	390957	386909	252017	88662.3	301824	307508	153838	78202.5	158286	326537	274804	325596	654726	737244	70011.4	190094	45504.6	78773.8	32668.1	94910	433064	66808.2	363770	171220	28905.1
71	gamma-L-Glutamyl-D-alanine	C03738	Gamma-glutamyls	219.098	0.668295	+	1196590	236324	1591884	1543189	604602	1105847	1135617	1103608	908534	1712067	1320042	254267	1026480	1400730	1033563	1020584	1466164	1878029	887298	921202	3055138	1350521	1982504	2340102	1643858	2147363	1392924	1713772	1486732	1781125	1491430	1107258	136579	1187144	11497.8	118569	68663.9	141643	1396670	447848	1567714	1367945	72863.1
72	(5-L-Glutamyl)-L-glutamine	C05283	Gamma-glutamyls	274.105	0.563031	-	536642	239899	358616	734036	111948	175136	450181	788861	256622	453458	782357	52315.8	303551	823582	427464	390801	225142	353811	569302	250156	605011	484773	536873	494786	904649	456037	556637	345802	362422	805102	697468	547426	19775.2	887443	3209.29	34008.6	13337.5	13699.5	513674	1573348	548197	513125	7292.83
73	Cystathionine	C00542	Serine biosynthesis and one-carbon metabolism	221.061	0.664979	-	262193	4936.42	286796	194943	81887.3	104660	253706	424093	145086	67480.5	94725.5	11254.1	293083	121893	180098	427059	125381	327700	383080	40566.5	389299	159835	215452	259391	462224	118841	149186	210413	239183	301830	196304	234339	14633.1	169744	1823.66	16901.5	4504.6	15575	292178	488728	170958	65853.5	3502.74
74	Dimethylglycine	C01026	Serine biosynthesis and one-carbon metabolism	104.071	0.662454	+	8354066	962595	7663878	9216428	2235576	4524422	9473853	8536516	5348398	6631296	8816943	1594535	9990634	7975232	6073416	15657320	6074522	14436740	11180240	5890586	10583590	9743296	10959330	8942612	10007500	8193154	10025170	13980110	16343420	8937508	9238904	10740510	795826	7659254	339606	1382429	664276	1226805	10695980	8380718	10279790	4545382	530186
75	Phosphoserine	C02532	Serine biosynthesis and one-carbon metabolism	186.018	0.657685	+	472528	363511	701598	990966	443304	291546	463570	643821	386163	359462	402448	507624	408676	849994	597382	514723	533689	515502	451398	358736	1328310	722284	717403	1130390	954137	647906	463892	759421	715591	1040411	643217	337532	657728	827593	916460	199902	715936	661338	414666	696073	619938	495584	650214
76	3-Phosphonooxypyruvate	C03232	Serine biosynthesis and one-carbon metabolism	182.968	0.792576	-	617698	447118	171065	835748	271803	311029	762727	675964	197097	391103	460095	286783	275473	594732	822674	350326	286344	304807	709948	378228	429791	481667	322295	197317	733202	180283	345572	294305	392411	294324	129856	545472	144104	793789	105111	199291	91636.5	148554	603970	679584	483711	379417	145927
77	Ornithine	C01602	Urea cycle	133.097	0.632111	+	2390744	213667	4741292	2664809	1002409	3120437	5252660	8000830	3563784	2084807	4198304	301099	10640670	3325895	3235389	13450530	4485150	7226226	5528296	1285050	13645790	6953034	11856790	7230648	9637399	3657389	5015012	7883808	9146959	9344633	2388214	4194034	530102	4151043	501234	600700	446229	693370	2467021	12040470	2645033	1478860	73640.9
78	L-Citrulline	C00327	Urea cycle	176.103	0.659774	+	540578	69119	1325792	470838	116065	219813	342565	322185	205381	430784	317520	55356.4	413646	260693	201894	394652	149613	437001	279241	123472	316598	447939	469753	414383	199769	432933	233421	462927	493368	246873	503075	417434	22226	455504	14712.8	63526.8	34928.2	80098.2	349214	76486.8	518522	328500	51299
79	Putrescine	C00134	Polyamines	89.1079	0.613413	+	1187970	209918	821381	1045931	783663	908454	2122774	2111017	882110	1312366	1282315	252189	1588568	1116800	1364451	2243880	870268	2337444	1654006	536995	2174550	1488354	2251214	1193076	2404485	539568	1347522	2356849	2078566	2205058	691477	1055106	63038.1	921376	36070.7	213291	38152.6	70860.2	1146058	1170750	1031135	582649	12379.3
80	Spermidine	C00315	Polyamines	146.165	0.602933	+	8133234	735326	5769180	9230245	1002470	2885304	8499624	8330212	2517019	11050580	6598296	913405	6005132	4950064	6154468	8134792	3520730	9189154	8852023	811803	6726456	7099918	7583270	5148632	7918350	3673311	3847380	8077124	8225756	7808374	9793989	2129639	39996.7	6651418	21152.1	97551.2	10686.7	62198.7	5701932	8003546	9495225	2206695	19279.7
81	alpha-D-Glucosamine 1-phosphate	C06156	Aminosugars	258.039	0.562287	-	692812	108949	278561	542194	69753.8	196210	511230	682127	196571	297520	414868	38111.4	432651	556141	446470	454024	136348	383669	625576	193761	534792	284086	205905	330549	412004	155590	311669	334235	273741	439813	393464	352119	10619.5	462732	0	26387.5	6828.63	8244.48	379679	477160	410209	131139	3678.56
82	D-Glucosamine	C00329	Aminosugars	180.086	0.64703	+	159673	78153.3	88229.1	107347	106157	98690.8	143830	119376	118136	145541	153929	84338	103571	58447.5	107904	153398	41979.5	131570	85317.9	72571	145725	179674	185841	93285.5	167197	93622.8	184101	148182	145959	183442	144262	147888	43798.7	167024	21242.4	72133.2	37922.6	48050.1	120625	187724	231342	251534	39526.9
83	1-4-beta-D-Xylan	C02352	Aminosugars	131.034	0.541992	-	1307020	164351	1359734	986466	351520	388360	1038798	972046	593712	426483	1046380	76783.4	880710	468421	560359	1439003	282023	723735	1001504	461080	990101	431820	731396	629704	1005101	620738	667455	1042074	924876	1042450	1603359	1580531	50073.1	1293865	35861.3	96178.4	51480.2	56489.5	1459491	1164776	973961	422692	28254.7
84	UDP-N-acetyl-D-glucosamine	C00043	Aminosugars	606.077	0.53025	-	344221	50114.9	327994	586974	49669	91609.9	453214	766808	80166.9	222155	230460	32303.7	228873	360646	255979	331436	105332	379393	639650	77849.7	233719	349175	353599	253795	696480	228312	172738	351018	326741	328708	423434	174426	3448.03	537680	1270.04	10433.6	8707.13	8524.49	345005	400690	421186	166146	0
85	Glycolate	C00160	Aminosugars	75.0076	0.689724	-	11904010	12082160	1969612	19736530	4932926	10445480	19188180	10113620	2736007	11294610	10907830	13849160	11109040	24629260	45085440	12505160	4704464	2852673	25693130	10609210	18718270	16875410	12201930	3661291	12069390	1877485	11309750	4566114	13145540	8102194	1611078	15054040	8382318	13175150	5635574	4840178	1522054	5197930	14567790	7271062	7978164	6909712	5733988
86	Carnosine	C00386	Arginine and proline metabolism	225.098	2.46508	-	192301	6199.47	41589.5	192447	12943	16126.2	229067	238117	60175.4	33742.4	34228.4	7168.1	63287.7	108268	181220	147960	8839.78	124071	111959	78185.4	206779	176295	139889	176206	260872	46642.6	0	0	238173	125754	112700	0	3517.96	471325	3882.9	6754.34	0	2839.34	220972	149436	132735	101322	3443.03
87	trans-4-Hydroxy-L-proline	C01157	Arginine and proline metabolism	130.05	0.570088	-	110947	88084.3	240898	233127	180458	161463	234925	218078	92124.1	106604	370538	33751.9	98005.7	294693	213953	248376	117596	157120	308218	338608	408066	247614	250148	223356	380376	178702	202122	204682	304215	279748	141056	81569	16397.6	304796	15755.1	19721.1	13810.2	17758.6	162549	230881	147840	113788	15390.6
88	Pantothenol	C00864	Panthothenate metabolism	220.117	0.673317	+	162055	111549	217062	295488	106068	94426.8	133478	168712	161156	108926	173450	47996.3	204318	207972	52953	53297.9	73130.2	187060	115065	76461.9	211185	118194	58378.7	107632	85286.3	82034.4	126545	170212	148928	193623	545781	361567	56824.6	199000	2843.92	102413	41503.3	69241	438242	137976	547936	263094	35767.7
89	Taurine	C00245	Sulfur metabolism	126.022	0.671607	+	1418172	1086071	1679118	1199848	1416917	1511100	1405836	1167135	1338999	1141426	1889398	650909	1352086	1550547	1372510	1258676	1839805	1493842	1171005	1740142	1511562	1167193	1045389	1648803	798079	1563331	1449583	1095524	1496724	1251815	1025976	1361048	655509	1342040	209901	512190	535425	704514	1176077	1792656	1069924	697690	418045
90	Hypotaurine	C00519	Sulfur metabolism	108.011	0.701466	-	57313	53841.8	35320.7	8794.46	41799.9	29590.1	47209	16847.5	35138.3	21368.8	31508.5	42971.5	38642.3	32764.2	27217.4	63615.1	43839.4	49641.4	51361.6	40577.2	134622	20843.9	33369.4	17197.3	31427.3	29457.8	49795.1	23609.9	22289.6	25991.8	36609.6	39300.2	53038.3	24751.9	49167.7	40484	58654.1	39120.7	25019.2	330941	18104.7	34177.4	50628.6
91	L-Methionine S-oxide	C02989	Sulfur metabolism	166.053	0.658792	+	19538310	2968878	9279470	14561830	2405369	7683130	19002530	13151130	10764590	9293665	28737970	4143170	22369680	16388360	10523290	13323720	8627383	26759700	9855482	16137820	12890480	27260280	21284870	26682960	11384890	14556200	2925738	26243180	27552410	19210360	16036830	5069164	777034	20941510	865460	1253990	1605224	1698792	24337790	11466540	10590900	6225988	704853
92	5-Hydroxyindoleacetate	C05635	Indole and Tryptophan	192.066	0.673977	+	35020.1	113908	139008	111687	270228	95811.3	154174	185935	78165.4	39064	28190.1	83820.2	37059.5	311525	64286.5	342186	440609	140845	126900	65132.8	208750	240273	264163	264592	155409	258028	56994.5	301050	241238	267611	98179	131790	122480	217863	225969	18549.4	387402	249557	360827	108176	206249	177477	81580.2
93	3-methyldioxyindole	C05834	Indole and Tryptophan	164.07	0.67108	+	329961	10414.1	46085.6	505687	28154.2	22428	186313	299427	98712.1	282264	261224	44109	186599	127833	207604	193073	52227.9	356959	91205.1	30034.4	225740	228387	440490	79411	222765	4381.32	153210	93888	85214.5	169978	294791	39701.4	7731.98	87898.8	15997.6	17392.4	24393.6	9946.01	136990	39898.7	214154	131597	14558.1
94	Indole-3-acetaldehyde	C00637	Indole and Tryptophan	158.06	1.97052	-	1673628	96875.3	2888445	1113268	395511	1507596	977512	1305789	1148702	1977100	1391606	492275	1914473	1359922	105846	3206055	928343	2527586	1161562	1081258	1346276	2600231	2144842	2999805	892701	1747646	1033202	4074063	2948052	2760478	2755144	844004	107172	1049495	90691.8	283232	132519	145417	2470386	7441.57	3533617	2146535	156560
95	Indolepyruvate	C00331	Indole and Tryptophan	202.048	0.675924	-	1326144	248483	154876	1936550	89340.5	206382	1331824	1707535	176736	669072	594715	145279	572169	972530	2591630	537880	114776	415668	1336061	123700	978721	563493	1085848	174278	1541347	79403.8	869236	242022	320147	758447	353120	574642	45697.5	475861	23155.9	33881.7	25782.9	40718.2	652325	578334	589584	429922	21429.5
96	6-Hydroxykynurenic acid	C08480	Indole and Tryptophan	204.031	0.640588	-	30749.8	90499.8	276418	446478	2603.07	5220.02	1027138	1066514	5918.79	162063	10687.1	12485.6	13488.5	387193	12091.1	204908	25221.9	343690	803055	6214.75	324078	217185	338798	399734	870552	88152.2	10135.6	107153	282178	298138	419655	9586.65	0	1303264	6546.27	1840.28	13373.8	4782.44	598148	1209119	344016	242061	3929.28
97	kynurenine	C00328	Indole and Tryptophan	209.091	0.666466	+	3658.2	426078	1499850	2652180	27530.8	70999.7	2095290	1613146	78089.9	1996076	127222	263705	3703.14	2512646	136959	2690873	1106947	2174556	1772668	80076.9	3522143	2695865	2891636	2193387	1999391	1343846	189782	2482175	2452713	2350041	2352915	90163.5	13322	2023202	140118	18283.8	334181	19692	2834168	1146304	2847691	1973536	234517
98	g-Oxalo-crotonate	C03453	Indole and Tryptophan	159.027	0.669042	+	321755	125231	49795.6	49562.8	82373	349149	226315	56695.6	179073	281217	191608	111337	160613	122682	122885	257441	185497	301460	255304	136221	237862	99160.2	214743	239762	137234	318785	180271	387467	353554	151008	280228	600593	301221	279309	113594	285857	186964	333364	335102	145224	359190	99792.9	119334
99	2-Aminomuconate	C02220	Indole and Tryptophan	156.028	0.643096	-	202938	187444	391413	206734	387673	273640	258371	276649	341156	218414	0	84967.3	303749	148036	61773.9	209204	481732	513712	181571	359132	266184	47714.4	184717	209703	415750	362966	229810	220563	262386	218928	385619	267009	280545	332934	223231	234838	89943.9	382825	262407	99055.6	118412	276484	106484
100	Ectoine	C06231	Inositol	143.082	0.666074	+	117915	74874.6	157646	48581.8	34607.8	52371.1	127649	93116	79892.9	61091	78571.7	49536.1	68163.9	202440	87748.8	195324	130967	107878	85781.6	62181.1	139968	127921	127068	105145	138294	139573	143221	237138	161522	212580	132597	91360.4	61458.3	197522	36519.9	39272.1	58295.1	38102	138586	112011	177258	156314	33501.9
101	Glycerol 3-phosphate	C00093	Glycerophospholipid biosynthesis	171.006	0.567196	-	912092	1632476	1626402	2411688	267319	1872646	3220247	2541250	1279104	2894278	586036	103562	1362734	1570439	2348396	1764758	954512	2613063	4532412	764557	818136	948397	1678968	1508080	4121774	1136960	1194600	1682213	1791763	2183721	2040875	1564056	47654	3759191	14433.7	158615	36683.6	51379.5	1749513	3263767	2260822	547121	36166.8
102	Ethanolamine phosphate	C00346	Glycerophospholipid biosynthesis	140.011	0.657008	-	194674	37181.1	64655.8	178880	237964	47208.2	843644	239775	49388.1	222018	551736	16157.2	377858	375429	697155	481685	222746	369333	678050	211884	312116	382338	343514	212458	312974	81977.5	275007	201183	226047	154138	128897	169202	7781.97	231649	0	22677.9	3896.63	12792.7	286222	218236	128266	24080.3	0
103	N-Methylethanolamine phosphate	C01210	Glycerophospholipid biosynthesis	156.042	0.642293	+	485611	187947	282628	907644	130785	111030	705131	681486	59230.8	621174	254216	136703	391941	336560	263155	693129	177041	311543	804269	270069	395443	582440	918683	344226	531605	164240	283618	627353	647333	298222	700759	349619	150981	1095448	133187	113368	109005	95977.2	943998	340693	1271806	192615	104208
104	Sphingosine	C00319	Glycerophospholipid biosynthesis	300.289	2.73408	+	668037	21648.3	142861	332754	29497.9	48501.4	236403	373694	80990.6	270328	503404	26641.7	197983	484971	350771	142202	36187.7	254365	156070	67936.5	269247	246451	166837	319264	224373	73834.6	331824	104141	102713	320584	138223	210631	22485.6	205360	22902.1	28509	33185.8	22655.7	106614	62689.7	92846.5	66332.8	22521.5
105	Sphingosine 1-phosphate	C06124	Glycerophospholipid biosynthesis	378.242	3.08825	-	625350	20974.5	616932	768153	117254	209917	886354	1259255	495859	578492	660569	42525.1	636597	853070	812179	638668	124504	721665	1171615	495186	682308	656081	577113	519298	1198444	383016	585703	551577	617770	626540	641207	806447	7403.42	1177754	21681.5	63433.1	12927.4	32646.9	700034	860992	636320	466847	0
106	sn-glycero-3-Phosphoethanolamine	C01233	Glycerophospholipid biosynthesis	214.048	0.637273	-	6772016	1858343	4017203	7945368	2124444	2657413	10507910	8749874	3352320	5471010	6202058	1445656	8341926	8836973	6762718	6979942	2912677	7799704	8285590	3105605	8647632	6636838	7837630	8063134	12387740	5102666	5621500	7062234	7205502	6891700	4730926	9343207	491886	7410944	99697.8	882618	247142	585740	6169986	4285558	4600726	3270381	211257
107	Acetylcholine	C01996	Glycerophospholipid biosynthesis	146.117	0.662059	+	4986196	1420937	5327423	8505613	869031	3072679	4463656	4068541	2463500	4012344	3723431	1141584	3759596	3881497	2046717	3856818	2166400	4404742	4005874	1709758	3743836	3866817	4362362	1697463	3658877	4376956	3624808	4503539	5255250	4657270	7517600	1839355	427479	4465196	227632	724917	359412	375890	4162627	1868063	6195640	2718593	749844
108	Choline	C00114	Glycerophospholipid biosynthesis	104.107	0.65162	+	176710100	74036900	115554400	183427700	103352400	112066600	147430400	202713600	145199400	250455900	187292600	64629650	174281600	145251900	199705400	202893100	106291900	206900000	157868400	160480600	183374400	179016100	171774300	175916400	164600000	74243290	194260200	156088000	152355200	155310700	138003600	196458300	36208980	167605200	18383040	57142030	21034810	36533820	198990900	88430470	151220200	106960800	27557990
109	L-Carnitine	C00318	Carnitine and fatty acid metabolism	162.113	0.654012	+	9979380	1521002	6267882	9264169	3314504	3776007	7824900	8286150	4286320	5821022	10840940	1582023	9239275	5633642	6433018	7590564	4093303	6263204	6436626	6676474	6159748	7869516	7408804	6483608	6019554	4504232	7167550	7655044	8100662	7119716	9925858	6586818	742067	9612249	285682	1429461	493146	952582	8929778	5948850	10258560	6572938	508539
110	acyl-C4-DC	HMDB13133	Carnitine and fatty acid metabolism	262.129	1.78583	+	45458.9	9462.9	80059.9	78013.2	10903.5	30795.5	54585.2	124568	11880.9	74106.1	26176.6	21947.2	78204	14364.9	34338.2	60897.1	38997	59194.7	65547.6	24534	67349.4	200138	116689	141207	107224	56350.6	22729.4	70410.2	84449.8	59091.5	115568	45928.1	7617.27	77479	2755.41	6631.9	4959.65	6044.17	74823	8176.35	87469.9	95571.9	0
111	acyl-C5:1 (Tiglylcarnitine)	HMDB02366	Carnitine and fatty acid metabolism	244.153	1.866	+	70058.2	85874.3	50861	94885.5	59987.1	34152.5	91400.9	86777.9	41045.9	50300.5	55107.6	56046.9	42775.6	82268.1	73886	62970.9	43986.6	45731.5	73794.7	47598.7	66664.4	36807.2	60048	69520.5	72494.6	49922.9	21686.2	54822.6	69150.6	33074.1	38011.2	55879.6	57559.1	62927.6	60453.7	62055.1	58478	48146.8	66122	86451.9	65576.8	43942.2	47641.4
112	acyl-C5-OH	ac107	Carnitine and fatty acid metabolism	262.164	1.86601	+	178180	226952	110395	175784	140965	121816	236861	206408	136086	119629	185701	171709	104074	206921	216905	147562	130437	190982	219187	113504	166752	116743	138180	141002	204654	154857	117748	153177	138819	143148	141583	238588	134720	167177	115314	122543	127377	132143	215539	200530	158646	175350	176132
113	acyl-C6-DC	ac109	Carnitine and fatty acid metabolism	290.16	1.81604	+	46290.1	68991	20173.4	79931.6	31948.1	13791.5	70611.6	69026.3	30694.7	15246	43690.7	63253.5	30331.8	61134	48641.3	45289.1	42005.3	60057.2	27867.2	34664.1	44665.6	49431	57843.9	42940	49935.7	39466.2	33330.3	28050.4	31599.6	20335.5	26728	49668.2	35187.2	63674.1	54337.1	47805.6	52656.6	24583.8	41087.4	75483.8	31122.4	19410.6	32225.8
114	acyl-C8 (L-octanoylcarnitine	HMDB00791	Carnitine and fatty acid metabolism	288.216	2.02524	+	113615	103832	104661	121108	50066	50429.4	92331.4	143366	22139.1	54395.5	103809	57585.7	90393.6	180237	93609	68444.9	65267.3	218001	89011.9	60046.6	175454	134936	168385	169819	196162	59562.2	97373	78305.3	89304.1	279125	56548.5	72226.7	64380	84718.5	59713.9	42611.3	55621.4	60115.7	65717.1	75764.2	74183.7	86044.5	25470.8
115	acyl-C10 (O-Decanoyl-L-carnitine)	HMDB00651	Carnitine and fatty acid metabolism	316.248	2.24706	+	78229.1	13981.5	87886.9	84264.9	0	28064.3	45271.6	104276	43074.7	64489.5	83057.6	4264.4	68747.4	140612	97346	61936.5	7945.61	117483	57046.9	25951.3	93740.8	78163.3	93641.6	118491	82185.5	33648.9	75624.8	85559.6	61934.7	192940	95909.6	68643.6	7349.88	78132.8	8080.06	4520.24	11224.7	5334.83	44007.5	86240.8	58199.1	62978.6	7080.77
116	acyl-C10:1 (O-Decenoyl-L-carnitine)	CID57357170	Carnitine and fatty acid metabolism	314.232	2.18329	+	144132	4675.45	170384	288455	10692.9	20940.5	120696	190144	60815.7	143804	79146.7	2087.2	153307	158088	166045	313840	12359.9	314852	179459	57395.6	149183	164833	219542	131349	331269	35456.9	114657	140114	160145	232546	165833	105585	6865.99	386029	3446.41	5030.44	2981.88	4482.09	137278	285454	233848	170304	7025.22
117	acyl-C12:1 (O-dodecenoyl-carnitine)	HMDB13326	Carnitine and fatty acid metabolism	342.264	2.25166	+	107019	0	176646	226237	10993.1	15729.4	138053	188191	75127.6	116482	137624	5381.34	119325	224000	122380	131146	13884.9	112181	45980.8	45471.7	180404	99293.1	76787.4	162419	102815	115888	83082.6	63759.6	61821.1	319079	167441	130306	0	108311	11972.7	14185	3881.78	5415.24	78720	87095.5	60176.5	45489.9	7874.98
118	acyl-C14:1 (Tetradecenoyl Carnitine)	HMDB13329	Carnitine and fatty acid metabolism	370.295	2.51105	+	91096.3	27429.8	81814.6	154549	19446.6	15476.6	82766.6	153997	41340.4	69749	82535.5	24424.9	44803.8	147821	79436.7	57784.1	24363.4	68770.2	56633.5	39817.5	77067.5	49050.2	36097.2	59945.4	70213.5	28314.4	46970.9	42186.1	34267.9	143123	85622.2	54085.3	18774	65310.1	21651.3	22703.2	23707.6	15594.2	41294.8	54424.3	25107	27814.7	17237.5
119	Hexanoic acid (caproate)	C01585	Saturated Fatty acids	115.076	1.81592	-	174634	197594	171209	173719	168893	165966	187982	209982	133638	174807	174335	152499	223030	207917	295158	231294	147084	146653	253182	165572	170564	159316	227385	157370	184285	138214	190829	219769	188469	212222	157140	156258	160373	198985	138327	143532	158755	145432	171091	191114	150150	170738	159456
120	Octanoic acid (caprylate)	C06423	Saturated Fatty acids	143.107	2.02577	-	1005915	553743	894107	1044310	723503	727809	1557116	2191954	752821	910076	721839	506850	1210949	1291375	1227460	2290802	898402	1139607	3411921	648047	1606376	1345893	1825527	1409761	2164356	786150	727562	2738970	1817660	2058574	591499	634184	384715	621138	454496	564053	395202	528442	624079	452064	568296	694644	363688
121	Nonanoic acid (pelargonate)	C01601	Saturated Fatty acids	157.123	3.03124	-	280717	259661	298294	198561	270726	307330	549698	661863	142009	120799	411978	475444	236177	555572	1126339	218474	189500	320517	553335	333042	216366	548024	226909	349162	381957	624613	324456	177215	178891	243548	210258	159439	277557	324550	128003	358379	298711	314833	339940	220104	513369	141239	197630
122	Decanoic acid (caprate)	C01571	Saturated Fatty acids	171.138	2.19356	-	3254725	1399366	1792977	3934005	1310954	1005273	5697394	5940066	1732872	2597195	2110397	1441286	3712937	5109893	2083502	5644882	1437046	3580426	8259362	1486296	6575746	4830618	10163180	5525530	10326400	2880507	2436906	7146150	9038013	6853774	2101703	2277538	1040242	2659165	1193955	1190029	979016	997800	3134938	3273099	2807883	1900483	1042474
123	Dodecanoic acid	C02679	Saturated Fatty acids	199.171	2.39396	-	71355050	2567763	37754960	72545930	5417194	12711050	91895740	101993600	16853040	47112900	32220360	2916972	57578920	83415580	89570420	64881850	6992862	111725300	87249620	23250580	115017200	92653640	137178500	107433900	247652500	14235760	55694400	95668740	117719200	79138500	49017520	36538010	959066	100355600	915178	1946685	625423	938826	46219380	79334780	62805070	35294750	839027
124	Tetradecanoic acid	C06424	Saturated Fatty acids	227.202	2.65851	-	145262700	5575068	54604510	247367200	6644374	14783380	183818800	280626800	33621900	102696300	87964280	5519656	130986300	215814400	178696200	109308700	11585860	151112700	246898000	50689980	158833500	202756100	151520400	189137000	399386800	40463210	133911300	147129800	158484500	162351600	218933300	130734800	1664861	296070300	1966254	4692337	2460420	1844177	195707900	238064800	191427800	93587060	1404900
125	Hexadecanoic acid	C00249	Saturated Fatty acids	255.234	3.04167	-	146250700	59865850	98162660	278304800	36956190	45653620	219083500	293151600	69143220	162404300	135481100	44410840	156923000	196738100	178187700	167862500	39561060	221426900	231770800	58021910	159527700	155025600	153290800	116441700	267392100	58954400	129007800	121256000	180893200	152305100	127264600	112962700	30160220	161441100	33018150	44487940	40392230	44100200	148573600	110089900	120943800	66259150	30933640
126	Octadecanoic acid	C01530	Saturated Fatty acids	283.266	3.60758	-	49159260	39316230	24431550	60895540	20145240	24434750	67442060	82039520	18048070	28563870	44779520	25516250	41604720	55388180	58987330	38077240	18895730	57409560	56930880	26446420	49071300	35568650	35401830	26411460	68988080	18043980	31887500	27566600	29564700	33798510	30088400	28588370	14090670	31291500	17948310	19157590	16357200	16667590	33532180	29848830	31926970	11274980	15448640
127	Tetradecenoic acid	C08322	Monounsaturated Fatty Acids	225.187	2.46244	-	262902000	5232576	99097920	253532800	8615829	22033110	209524400	292365900	39397810	97714490	101269800	4009371	139996500	222542800	211157400	140341200	12706020	228286400	253384500	76324360	255382500	192948800	237075900	199017400	494369400	49693960	135282600	131602700	220459900	251077100	245339500	134729600	1102747	422054800	454735	5578472	674551	1310927	243023900	376921700	292331300	95840260	726373
128	Hexadecenoic acid	C08362	Monounsaturated Fatty Acids	253.219	2.69893	-	404622000	7944102	174106300	681929000	26691340	45417360	599390100	793944400	92121780	291420100	313160500	12533730	309501800	579235600	547078100	330861200	41983890	407689700	652739900	153877100	431446800	569235100	346072200	353970000	814877200	189779800	453742600	376026900	448682000	516490200	512137600	413355600	1227066	745465100	1786516	15803230	3024703	3053170	448301300	681662400	540936400	246734800	1146397
129	Octadecenoic acid	C00712	Monounsaturated Fatty Acids	281.25	3.08599	-	223012200	3630423	130571100	290397700	10321920	22746410	339754400	388513000	69874020	190074000	198065600	7404608	205834400	311910600	250704800	203580000	12823050	257523600	343001000	58653510	232247900	271512600	238795500	210112000	414005200	65660710	172017700	207026000	220531300	274379900	231122600	208317200	2000474	289857300	2017986	6762272	2564762	2702380	238559400	214428000	166711700	116667900	1769378
130	Linoleate	C01595	Poly-unsaturated Fatty Acids	279.234	2.76264	-	264774300	3057334	102137000	335590000	8725725	20677480	300699300	300192000	56969040	186933700	178425900	6484076	197885200	362618500	286374100	152140800	12414580	205693300	287485300	51419290	199582800	240738200	132973700	173599900	371022600	62447040	174327300	146313800	224586200	222916400	163903800	145864500	546692	164453700	895509	3079087	1066208	878134	149697900	151701700	129787400	27320010	540561
131	Octadecatrienoic acid	C06427	Poly-unsaturated Fatty Acids	277.219	2.55199	-	15664300	199560	9190728	21141480	705168	1598291	24217940	32327190	2490481	11390270	11258030	227150	11550160	20111620	21615640	11361330	1078894	20586150	24062470	4505331	17921620	17626490	15212670	14491400	49387240	4695944	12489140	14951090	14749520	15384490	8019164	7767202	36410.6	20410510	22610.6	126975	62733.5	49422	5816930	12787070	10727860	2425614	32928.2
132	Dodecanedioic acid	C02678	Poly-unsaturated Fatty Acids	229.145	0.66023	-	102693	91992.1	54464.6	40027.4	38328.2	43856.1	80327	97522.3	48310.5	64029	80566.7	46177.4	63799.2	96147.6	61592.3	67925.8	29203.8	67888.3	109698	44197.4	82867.5	77463.6	141834	75308.3	62230.4	54740.1	53081.6	97151.7	97352.9	76487.9	70083.1	81750.4	40586.8	70548.4	38148.8	41651	36480.3	28068.6	78992.8	102946	58986.6	67530.8	39588.8
133	Nicotinic acid	C00253	Additional Bioactive Lipids	124.039	0.719998	+	635395	201095	679971	768324	357083	724140	484456	765222	691016	662412	502608	171429	482968	423108	343457	563407	490736	0	0	471681	0	1691603	2778444	2220250	1863379	2216651	1573833	2056134	1828795	2813065	1769436	1148003	266514	1516587	169204	363172	167663	243652	1140393	549546	1860984	1393522	186213
134	Triacanthine	C08435	Other	204.123	0.668678	+	2773055	2761713	4917678	4199588	830732	7285426	2154728	3626158	4121015	7293024	2434076	669994	2211431	2287324	2224508	2207859	1365328	1939564	2242040	1620962	1343961	1633994	1653760	1604143	2678225	2846421	1579035	3442001	3591680	1916088	7298732	4751554	769120	6551346	305131	984332	551892	802628	5308884	1632667	7658542	1771468	1293748
135	N5-Methyl-L-glutamine	C03153	Other	161.092	0.664726	+	467706	111116	749008	573915	199112	553669	474266	314516	521860	390262	515229	114821	564439	389589	298782	635189	346568	578347	448243	325361	678761	838570	451658	645149	394697	446591	342133	1233956	1101496	461823	561931	540671	69004.7	558273	10486.1	51808.4	47594.8	94433.1	813348	370912	433046	488929	43275.7
136	2-Methyleneglutarate	C02930	Other	145.049	0.660822	+	221759	207552	206113	242570	286260	302505	274115	212049	314613	328397	233834	269410	334441	251681	187720	261111	256986	212177	254453	314162	233952	314138	225898	172415	145568	288473	292285	384881	421387	251571	228371	226539	121342	212169	66082.3	606258	88954.2	190713	312287	113656	261243	311377	319234
137	3-Oxalomalate	C01990	Other	207.014	0.642742	+	1021653	563991	1498522	1014885	505479	1032150	1143724	1515759	1235968	1049824	1734238	321649	834446	923268	1265534	1199738	696647	1105010	1073472	898502	618004	1181583	1245131	798107	1152690	1016046	1194457	1254903	1115932	1174796	1516078	1406211	89838.5	1896912	31121.1	202821	80195.6	113901	1666315	2469588	1515402	1120706	72005.8
138	cis-p-Coumarate	C06738	Other	165.055	0.668704	+	33141900	1439574	9078021	36988490	2375101	5348436	23505140	26521290	9262585	32821860	21253050	1477902	22914130	11858800	17238360	23223190	3246799	26552660	14304280	3180541	31066820	15982580	37761520	6614990	23341710	5669634	23552220	13054750	14924660	25243800	30861940	10830900	989227	5942066	372703	1024870	805691	1265367	12954600	6060716	22562420	11282150	1059928
139	N6-Methyl-L-lysine	C02728	Other	161.129	0.628149	+	1239558	398177	1150032	1171410	336587	709186	1418468	1572222	1078935	1696515	1373424	344571	1303552	950939	866496	1889572	545281	1651882	1058870	501892	1647072	1444603	1512712	1203236	1759583	715606	1094513	1557604	1407784	1711532	2119702	760344	60946	1239176	10113.6	170195	50970.7	84829.8	1353238	1089092	1267252	1093759	41101.9
140	S-Acylglutathione	C02589	Other	333.06	0.557844	-	2022523	322285	1389192	2018310	319726	556168	2681621	3085563	686725	1102073	1130518	184424	1832971	2631645	2221790	2655781	797856	1669954	3483647	556515	3166637	1291974	1590452	1808585	1881275	731892	1336208	1354647	1349646	1795070	1457417	1685566	60255.7	2044304	30318.9	141520	56180.3	66979.3	1918114	975553	1245536	671257	20428.4
[truncated: 229 more columns]

## Sheet: Key
Diet
MYD	Medium-yeast diet
HYD	High-yeast diet
HSD	High-sugar diet
HFD	Hgih-fat diet
Genotypes
dcg-iW	CTRL-KD
dcg-iSpen	Spen-KD
3 trials, 30 individuals per trial
	ie 3x30 Spen-KD|MYD
Color coding
Green	Significance
Red	Increased Abundance
Blue	Decreased Abundance
